# Supplementary material for: Identification of Novel Reassortant Shuni Virus Strain in Clinical Cases of Israeli Ruminants, 2020–2021
Source: MDPI journal article supplement (doi:10.3390/tropicalmed7100297), 2022-10-13
Supplement: s1 [file s1]

# Supplementary Materials: Identification of Novel Reassortant Shuni Virus Strain in Clinical Cases of Israeli Ruminants, 2020–2021

**Table S1.** Information on Israeli Shuni virus strains collected in 2020–2021.

| S Segment     |          |             |                | M Segment |                |                | L Segment |                |                |
|---------------|----------|-------------|----------------|-----------|----------------|----------------|-----------|----------------|----------------|
| Strain        | Ac. Num  | Seq. Region | Phyl. Analysis | Ac. Num   | Seq. Region    | Phyl. Analysis | Ac. Num   | Seq. Region    | Phyl. Analysis |
| ISR-222/20    | ON920930 | 14–842/852  | yes            | ON920929  | 14–4274/4351   | yes            | ON920928  | 27–6886/6910   | yes            |
| ISR-3024/21   | ON920932 | 47–753/852  | yes            | ON920931  | 656–1193/4351  | no             | -         | -              | -              |
| ISR-1821/2/21 | -        | -           | -              | OP131184  | 3574–4323/4351 | no             | OP131183  | 2924–3171/6910 | yes            |
| ISR-190/21    | -        | 60–275/852  | no             | -         | -              | -              | -         | -              | -              |

Ac. Num- accession number; Seq. Region- sequenced region/total length of the segment sequence;  
Phyl. Analysis- phylogenetic analysis.

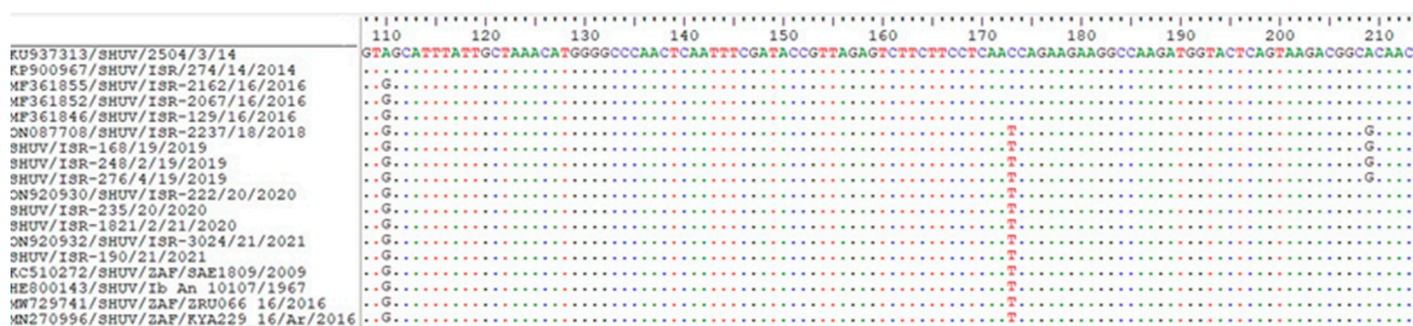

**Figure S1.** Nucleotide alignment of S segment region of Israeli and global SHUV. Dots showed the same nucleotide in the position.

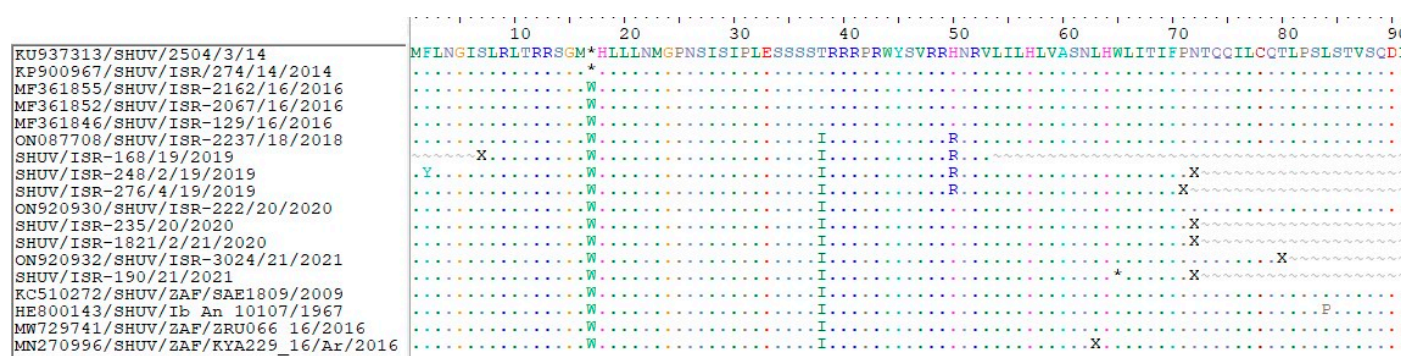

**Figure S2.** Amino acid alignment of nonstructural S protein of Israeli and global SHUV. X- incomplete codon of the amino acid. Dots showed the same amino acid in the position.
